# Supplementary material for: High EZH2 Protein Expression Is Associated with Poor Overall Survival in Patients with Luminal A Breast Cancer
Source: PubMed Central journal article supplement — J Breast Cancer. 2016 Mar 25;19(1):53–60. doi: 10.4048/jbc.2016.19.1.53 (PMC4822107; doi:10.4048/jbc.2016.19.1.53), 2016-03-25
Supplement: jbc-19-53-s001.pdf [file jbc-19-53-s001.pdf]

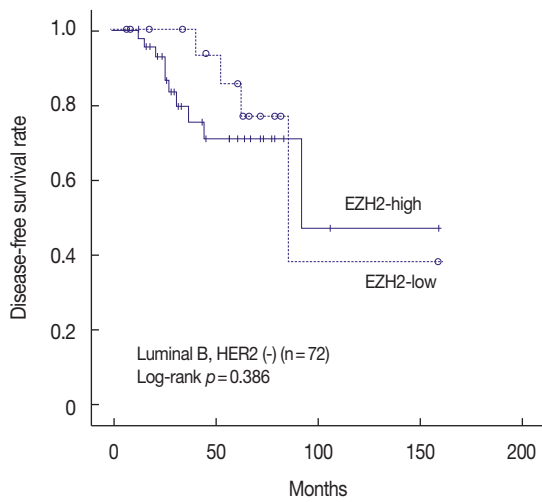

**A**

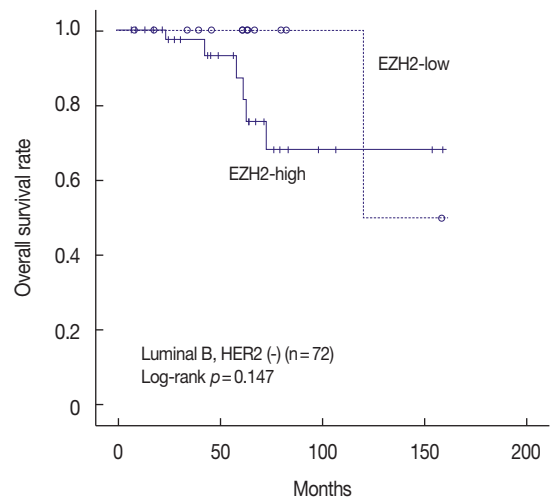

**B**

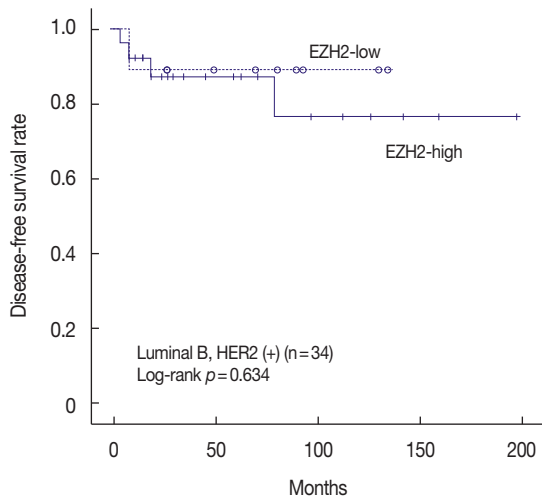

**C**

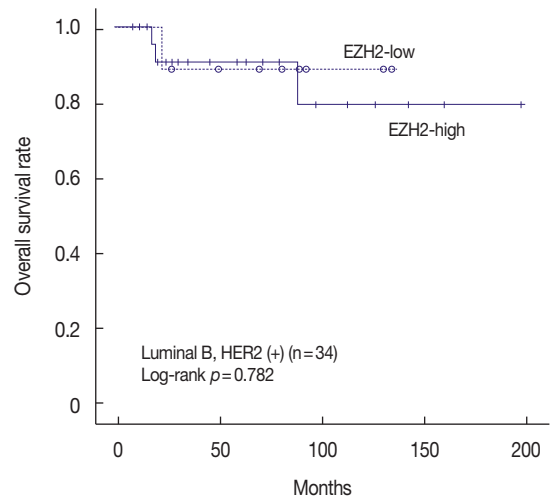

**D**

**Supplementary Figure 1.** Kaplan-Meier survival curve for enhancer of zeste homologue 2 (EZH2) according to the luminal B, human epidermal growth factor receptor 2 (HER2), and triple-negative breast cancer (TNBC) subtype. (A) Disease-free survival (DFS) ( $p=0.386$ ) and (B) overall survival (OS) ( $p=0.147$ ) in patients with in HER2-negative luminal B type ( $n=72$ ). (C) DFS ( $p=0.634$ ) and (D) OS ( $p=0.782$ ) in patients with in HER2-positive luminal B type ( $n=34$ ).

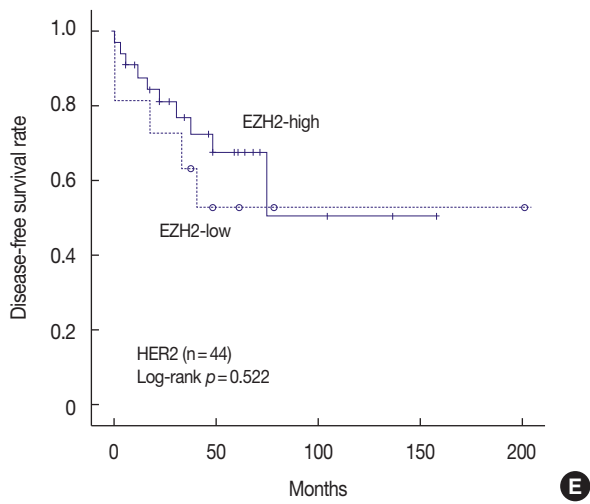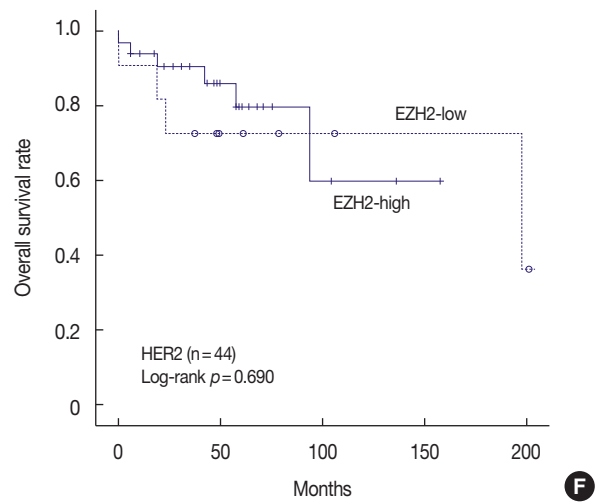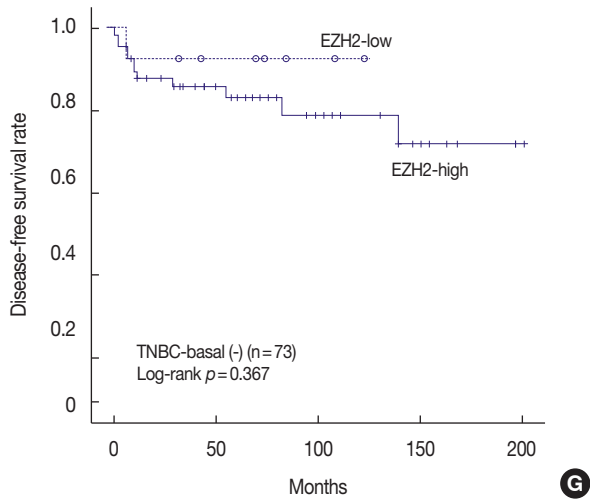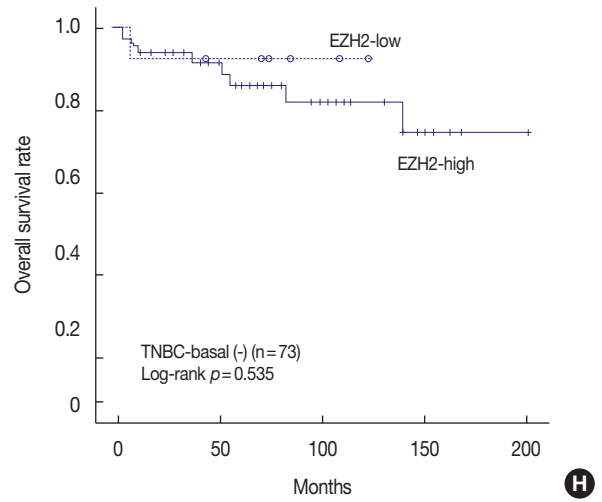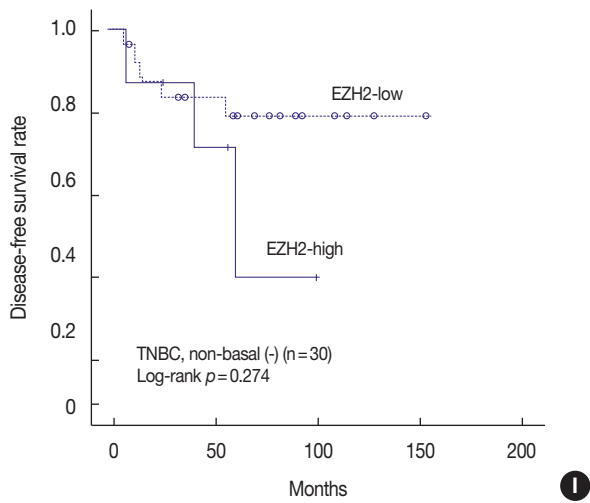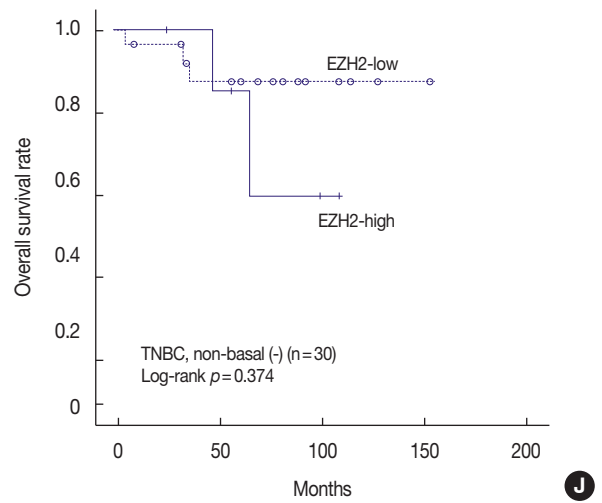

**Supplementary Figure 1.** Continued. (E) DFS ( $p=0.522$ ) and (F) OS ( $p=0.690$ ) in patients with in HER2 type (n=44). (G) DFS ( $p=0.367$ ) and (H) OS ( $p=0.535$ ) in patients with in TNBC basal type (n=73). (I) DFS ( $p=0.274$ ) and (J) OS ( $p=0.374$ ) in patients with in TNBC non-basal type (n=30).
